# Supplementary material
Source: Springer Nature journal article supplement (http://www.springermedizin.de/resource/supplementary/12885_2009_1885_MOESM2_ESM.pdf/9461490)

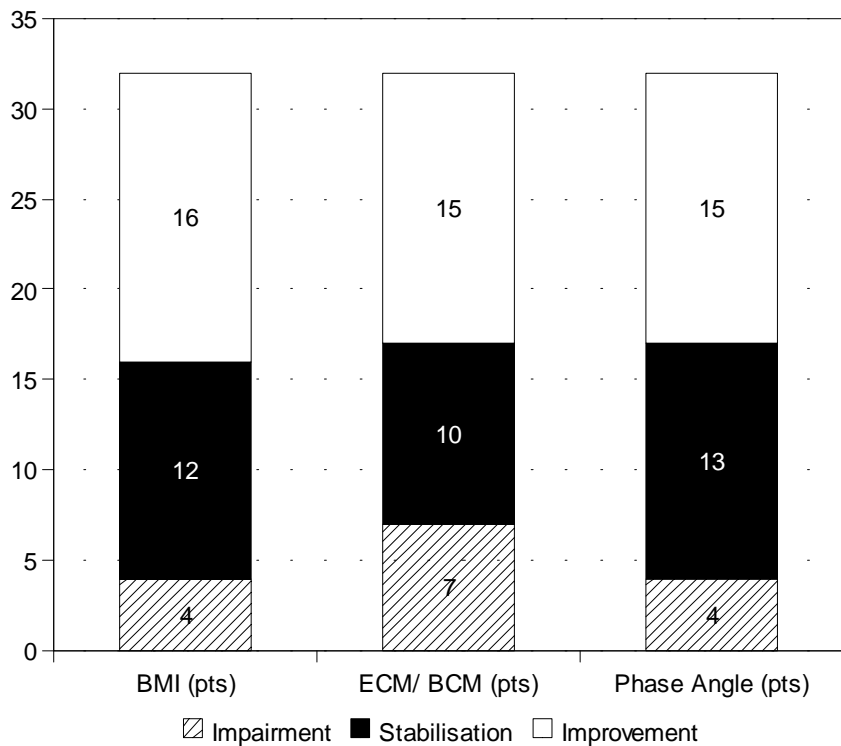

Supplement: MOESM2 [file 9461490]
